# Supplementary material for: Volatile organic compounds and ozone air pollution in an oil production region in northern China
Source: Copernicus journal article supplement (doi:10.5194/acp-20-7069-2020), 2020-06-15
Supplement: Supplementary file 1 [file acp-20-7069-2020-supplement.pdf]

Supplement of Atmos. Chem. Phys., 20, 7069–7086, 2020  
<https://doi.org/10.5194/acp-20-7069-2020-supplement>  
© Author(s) 2020. This work is distributed under  
the Creative Commons Attribution 4.0 License.

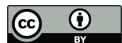

*Supplement of*

## **Volatile organic compounds and ozone air pollution in an oil production region in northern China**

**Tianshu Chen et al.**

*Correspondence to:* Likun Xue (xuelikun@sdu.edu.cn)

The copyright of individual parts of the supplement might differ from the CC BY 4.0 License.

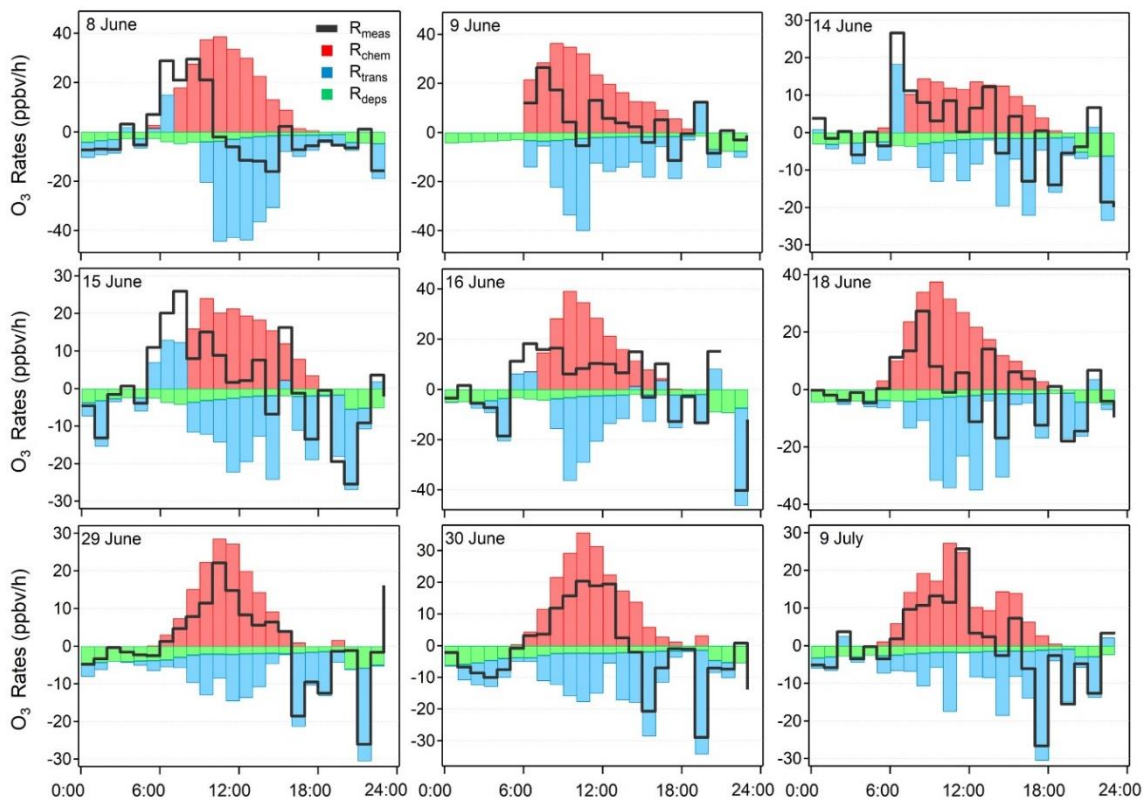

**Figure S1.** The observed rate of change in  $O_3$  concentrations ( $R_{meas}$ ) and the contributions from photochemistry ( $R_{chem}$ ), transport ( $R_{trans}$ ), and deposition ( $R_{deps}$ ) in the YeIRD during the nine selected  $O_3$  episodes.

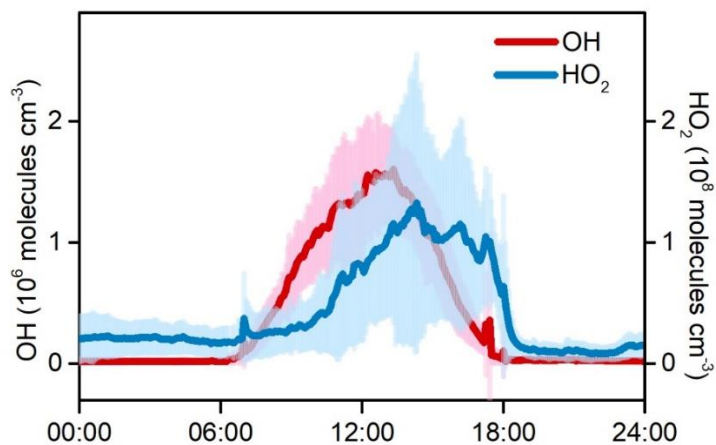

**Figure S2.** Model-simulated average diurnal variations of OH and  $HO_2$  during the eight selected cases in February-March 2017. The shaded areas indicate the standard deviations of the mean.

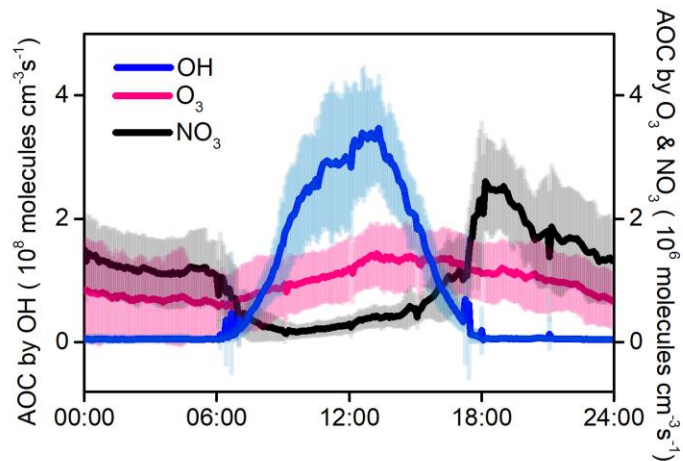

**Figure S3.** Model-calculated average oxidation capacity of OH, O<sub>3</sub> and NO<sub>3</sub> during the eight selected cases in February-March 2017. The error bars indicate the standard deviations of the mean.

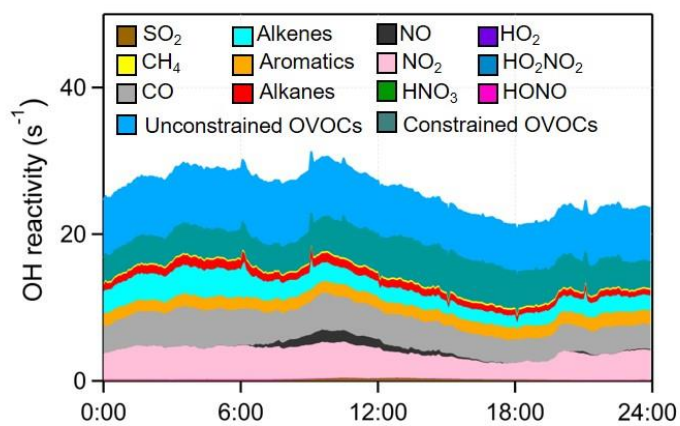

**Figure S4.** Model-calculated average OH reactivity ( $K_{OH}$ ) and its breakdown to the major reactants during the eight selected cases in February-March 2017.

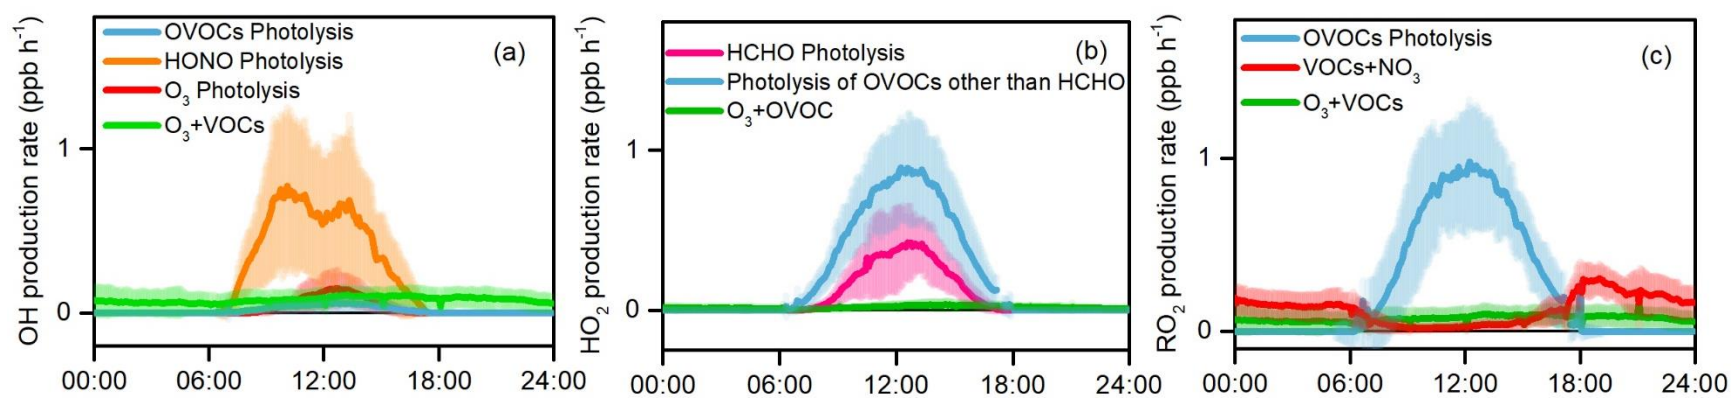

**Figure S5.** Model-simulated average primary production rates of (a) OH, (b) HO<sub>2</sub>, and (c) RO<sub>2</sub> during the eight selected cases in February-March 2017. The error bars indicate the standard deviations of the mean.

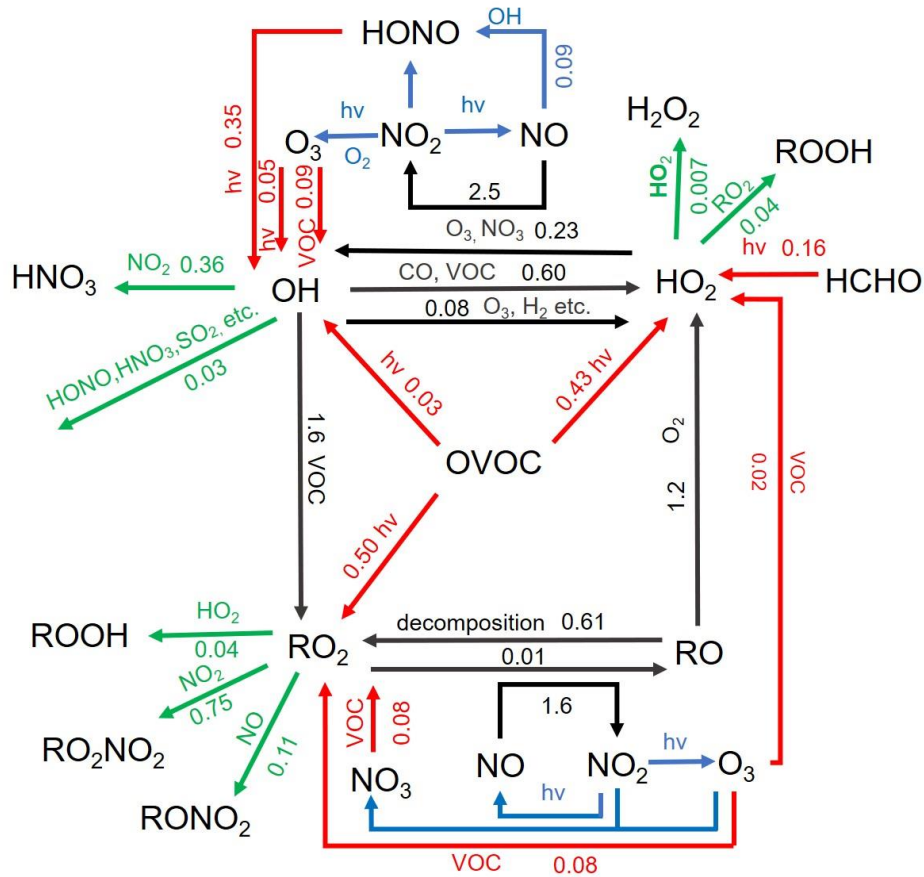

**Figure S6.** Daytime average (6:00-18:00 LT) RO<sub>x</sub> budget during the eight selected cases in February-March 2017. The unit is ppb h<sup>-1</sup>. The red, green and black lines indicate the production, destruction and recycling pathways of radicals, respectively.

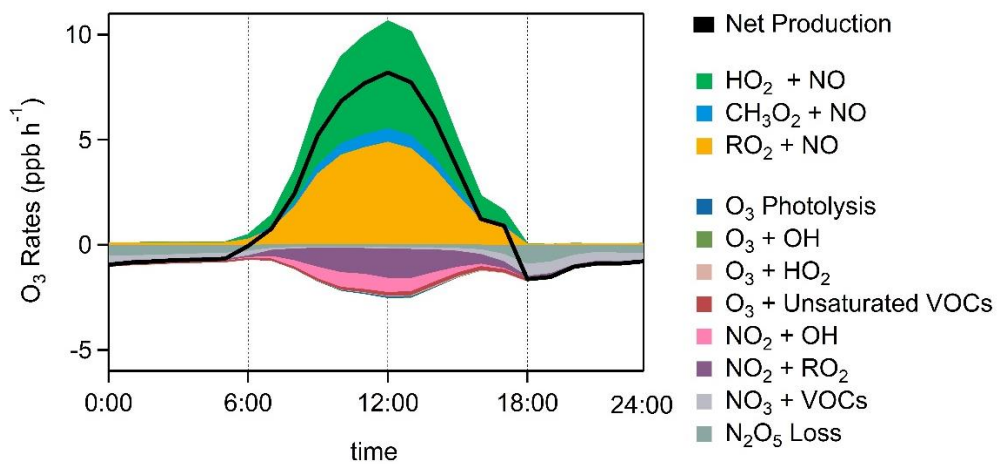

**Figure S7.** Simulated average O<sub>3</sub> budget during the eight selected cases in February-March 2017.
